# Supplementary material
Source: PubMed Central journal article supplement (PMC7255280)
Supplement: mmc1.pdf [file mmc1.pdf]

# THE LANCET

## Supplementary appendix

This appendix formed part of the original submission and has been peer reviewed.  
We post it as supplied by the authors.

Supplement to: Schwalbe N, Wahl B. Artificial intelligence and the future of global health. *Lancet* 2020; **395**: 1579–86.

**Title:** Artificial intelligence and the future of global health

**Coauthors:** Nina Schwalbe MPH,<sup>1,3</sup> Brian Wahl, PhD<sup>2,3</sup>

1. Columbia Mailman School of Public Health, New York, USA
2. Johns Hopkins Bloomberg School of Public Health, Baltimore, USA
3. Spark Street Consulting, LLC, New York, USA

**Corresponding author:** Nina Schwalbe, New York, USA, +1 917 226 2645,

[nschwalbe@ssc.nyc](mailto:nschwalbe@ssc.nyc)

## Appendix 1: Literature review search strategy

**Search strategy:** (concept 1 OR concept 2 OR concept 3 OR concept 4 OR concept 5 OR concept 6 OR concept 7) AND concept 8

- **Search concept 1:** “developing country”[Title/Abstract] OR “developing countries”[Title/Abstract] OR “developing nation”[Title/Abstract] OR “developing nations”[Title/Abstract] OR “developing population”[Title/Abstract] OR “developing populations”[Title/Abstract] OR “developing world”[Title/Abstract] OR “less developed country”[Title/Abstract] OR “less developed countries”[Title/Abstract] OR “less developed nation”[Title/Abstract] OR “less developed nations”[Title/Abstract] OR “less developed population”[Title/Abstract] OR “less developed populations”[Title/Abstract] OR “less developed world”[Title/Abstract] OR “lesser developed country”[Title/Abstract] OR “lesser developed countries”[Title/Abstract] OR “lesser developed nation”[Title/Abstract] OR “lesser developed nations”[Title/Abstract] OR “lesser developed population”[Title/Abstract] OR “lesser developed populations”[Title/Abstract] OR “lesser developed world”[Title/Abstract] OR “under developed country”[Title/Abstract] OR “under developed countries”[Title/Abstract] OR “under developed nation”[Title/Abstract] OR “under developed nations”[Title/Abstract] OR “under developed population”[Title/Abstract] OR “under developed populations”[Title/Abstract] OR “under developed world”[Title/Abstract] OR “underdeveloped country”[Title/Abstract] OR “underdeveloped countries”[Title/Abstract] OR “underdeveloped nation”[Title/Abstract] OR “underdeveloped nations”[Title/Abstract] OR “underdeveloped population”[Title/Abstract] OR “underdeveloped populations”[Title/Abstract] OR “underdeveloped world”[Title/Abstract] OR “middle income country”[Title/Abstract] OR “middle income countries”[Title/Abstract] OR “middle income nation”[Title/Abstract] OR “middle income nations”[Title/Abstract] OR “middle income population”[Title/Abstract] OR “middle income populations”[Title/Abstract] OR “low income country”[Title/Abstract] OR “low income countries”[Title/Abstract] OR “low income nation”[Title/Abstract] OR “low income nations”[Title/Abstract] OR “low income population”[Title/Abstract] OR “low income populations”[Title/Abstract] OR “lower income country”[Title/Abstract] OR “lower income countries”[Title/Abstract] OR “lower income nation”[Title/Abstract] OR “lower income nations”[Title/Abstract] OR “lower income population”[Title/Abstract] OR “lower income populations”[Title/Abstract] OR “underserved country”[Title/Abstract] OR “underserved countries”[Title/Abstract] OR “underserved nation”[Title/Abstract] OR “underserved nations”[Title/Abstract] OR “underserved population”[Title/Abstract] OR “underserved populations”[Title/Abstract] OR “underserved world”[Title/Abstract] OR “under served country”[Title/Abstract] OR “under served countries”[Title/Abstract] OR “under served nation”[Title/Abstract] OR “under served nations”[Title/Abstract] OR “under served population”[Title/Abstract] OR “under served populations”[Title/Abstract] OR “under served world”[Title/Abstract] OR “deprived country”[Title/Abstract] OR “deprived countries”[Title/Abstract] OR “deprived nation”[Title/Abstract] OR “deprived nations”[Title/Abstract] OR “deprived population”[Title/Abstract] OR “deprived

populations”[Title/Abstract] OR “deprived world”[Title/Abstract]

- **Search concept 2:** “poor country”[Title/Abstract] OR “poor countries”[Title/Abstract] OR “poor nation”[Title/Abstract] OR “poor nations”[Title/Abstract] OR “poor population”[Title/Abstract] OR “poor populations”[Title/Abstract] OR “poor world”[Title/Abstract] OR “poorer country”[Title/Abstract] OR “poorer countries”[Title/Abstract] OR “poorer nation”[Title/Abstract] OR “poorer nations”[Title/Abstract] OR “poorer population”[Title/Abstract] OR “poorer populations”[Title/Abstract] OR “poorer world”[Title/Abstract] OR “developing economy”[Title/Abstract] OR “developing economies”[Title/Abstract] OR “less developed economy”[Title/Abstract] OR “less developed economies”[Title/Abstract] OR “lesser developed economy”[Title/Abstract] OR “lesser developed economies”[Title/Abstract] OR “under developed economy”[Title/Abstract] OR “under developed economies”[Title/Abstract] OR “underdeveloped economy”[Title/Abstract] OR “underdeveloped economies”[Title/Abstract] OR “middle income economy”[Title/Abstract] OR “middle income economies”[Title/Abstract] OR “low income economy”[Title/Abstract] OR “low income economies”[Title/Abstract] OR “lower income economy”[Title/Abstract] OR “lower income economies”[Title/Abstract] OR “low gdp”[Title/Abstract] OR “low gnp”[Title/Abstract] OR “low gross domestic”[Title/Abstract] OR “low gross national”[Title/Abstract] OR “lower gdp”[Title/Abstract] OR “lower gnp”[Title/Abstract] OR “lower gross domestic”[Title/Abstract] OR “lower gross national”[Title/Abstract] OR “lmic”[Title/Abstract] OR “lmics”[Title/Abstract] OR “third world”[Title/Abstract] OR “lami country”[Title/Abstract] OR “lami countries”[Title/Abstract] OR “transitional country”[Title/Abstract] OR “transitional countries”[Title/Abstract]
- **Search concept 3:** “Africa”[Title/Abstract] OR “Asia”[Title/Abstract] OR “Caribbean”[Title/Abstract] OR “West Indies” [Title/Abstract] OR “South America”[Title/Abstract] OR “Latin America”[Title/Abstract] OR “Central America”[Title/Abstract] OR “Atlantic Islands”[Title/Abstract] OR “Commonwealth of Independent States”[Title/Abstract] OR “Pacific Islands”[Title/Abstract] OR “Indian Ocean Islands”[Title/Abstract] OR “Eastern Europe”[Title/Abstract] OR “Afghanistan”[Title/Abstract] OR “Albania”[Title/Abstract] OR “Algeria”[Title/Abstract] OR “Angola”[Title/Abstract] OR “Antigua”[Title/Abstract] OR “Barbuda”[Title/Abstract] OR “Argentina”[Title/Abstract] OR “Armenia”[Title/Abstract] OR “Armenian”[Title/Abstract] OR “Aruba”[Title/Abstract] OR “Azerbaijan”[Title/Abstract] OR “Bahrain”[Title/Abstract] OR “Bangladesh”[Title/Abstract] OR “Barbados”[Title/Abstract] OR “Benin”[Title/Abstract] OR “Byelarus”[Title/Abstract] OR “Byelorussian”[Title/Abstract] OR “Belarus”[Title/Abstract] OR “Belorussian”[Title/Abstract] OR “Belorussia”[Title/Abstract] OR “Belize”[Title/Abstract] OR “Bhutan”[Title/Abstract] OR “Bolivia”[Title/Abstract] OR “Bosnia”[Title/Abstract] OR “Herzegovina”[Title/Abstract] OR “Hercegovina”[Title/Abstract] OR “Botswana”[Title/Abstract] OR “Brasil”[Title/Abstract] OR “Brazil”[Title/Abstract] OR “Bulgaria”[Title/Abstract] OR “Burkina Faso”[Title/Abstract] OR “Burkina Fasso”[Title/Abstract] OR “Upper Volta”[Title/Abstract] OR “Burundi”[Title/Abstract]

OR “Urundi”[Title/Abstract] OR “Cambodia”[Title/Abstract] OR “Khmer Republic”[Title/Abstract] OR “Kampuchea”[Title/Abstract] OR “Cameroon”[Title/Abstract] OR “Cameroons”[Title/Abstract] OR “Cameron”[Title/Abstract] OR “Camerons”[Title/Abstract] OR “Cape Verde”[Title/Abstract] OR “Central African Republic”[Title/Abstract] OR “Chad”[Title/Abstract] OR “Chile”[Title/Abstract] OR “China”[Title/Abstract] OR “Colombia”[Title/Abstract] OR “Comoros”[Title/Abstract] OR “Comoro Islands”[Title/Abstract] OR “Comores”[Title/Abstract] OR “Mayotte”[Title/Abstract] OR “Congo”[Title/Abstract] OR “Zaire”[Title/Abstract] OR “Costa Rica”[Title/Abstract] OR “Cote d’Ivoire”[Title/Abstract] OR “Ivory Coast”[Title/Abstract] OR “Croatia”[Title/Abstract] OR “Cuba”[Title/Abstract] OR “Cyprus”[Title/Abstract] OR “Czechoslovakia”[Title/Abstract] OR “Czech Republic”[Title/Abstract] OR “Slovakia”[Title/Abstract] OR “Slovak Republic”[Title/Abstract] OR “Djibouti”[Title/Abstract] OR “French Somaliland”[Title/Abstract] OR “Dominica”[Title/Abstract] OR “Dominican Republic”[Title/Abstract] OR “East Timor”[Title/Abstract] OR “East Timur”[Title/Abstract] OR “Timor Leste”[Title/Abstract] OR “Ecuador”[Title/Abstract] OR “Egypt”[Title/Abstract] OR “United Arab Republic”[Title/Abstract] OR “El Salvador”[Title/Abstract] OR “Eritrea”[Title/Abstract] OR “Estonia”[Title/Abstract] OR “Ethiopia”[Title/Abstract] OR “Fiji”[Title/Abstract] OR “Gabon”[Title/Abstract] OR “Gabonese Republic”[Title/Abstract] OR “Gambia”[Title/Abstract] OR “Gaza”[Title/Abstract] OR “Georgia Republic”[Title/Abstract] OR “Georgian Republic”[Title/Abstract] OR “Ghana”[Title/Abstract] OR “Gold Coast”[Title/Abstract] OR “Greece”[Title/Abstract] OR “Grenada”[Title/Abstract] OR “Guatemala”[Title/Abstract] OR “Guinea”[Title/Abstract] OR “Guam”[Title/Abstract] OR “Guiana”[Title/Abstract] OR “Guyana”[Title/Abstract] OR “Haiti”[Title/Abstract] OR “Honduras”[Title/Abstract] OR “Hungary”[Title/Abstract] OR “India”[Title/Abstract] OR “Maldives”[Title/Abstract] OR “Indonesia”[Title/Abstract] OR “Iran”[Title/Abstract] OR “Iraq”[Title/Abstract] OR “Isle of Man”[Title/Abstract] OR “Jamaica”[Title/Abstract] OR “Jordan”[Title/Abstract] OR “Kazakhstan”[Title/Abstract] OR “Kazakh”[Title/Abstract] OR “Kenya”[Title/Abstract] OR “Kiribati”[Title/Abstract] OR “Korea”[Title/Abstract] OR “Kosovo”[Title/Abstract] OR “Kyrgyzstan”[Title/Abstract] OR “Kirghizia”[Title/Abstract] OR “Kyrgyz Republic”[Title/Abstract] OR “Kirghiz”[Title/Abstract] OR “Kirgizstan”[Title/Abstract] OR “Lao PDR”[Title/Abstract] OR “Laos”[Title/Abstract] OR “Latvia”[Title/Abstract] OR “Lebanon”[Title/Abstract] OR “Lesotho”[Title/Abstract] OR “Basutoland”[Title/Abstract] OR “Liberia”[Title/Abstract] OR “Libya”[Title/Abstract] OR “Lithuania”[Title/Abstract]

- **Search concept 4:** “Macedonia”[Title/Abstract] OR “Madagascar”[Title/Abstract] OR “Malagasy Republic”[Title/Abstract] OR “Malaysia”[Title/Abstract] OR “Malaya”[Title/Abstract] OR “Malay”[Title/Abstract] OR “Sabah”[Title/Abstract] OR “Sarawak”[Title/Abstract] OR “Malawi”[Title/Abstract] OR “Nyasaland”[Title/Abstract] OR “Mali”[Title/Abstract] OR “Malta”[Title/Abstract] OR “Marshall Islands”[Title/Abstract] OR “Mauritania”[Title/Abstract] OR “Mauritius”[Title/Abstract] OR “Agalega Islands”[Title/Abstract] OR “Melanesia”[Title/Abstract] OR

“Mexico”[Title/Abstract] OR “Micronesia”[Title/Abstract] OR “Middle East”[Title/Abstract] OR “Moldova”[Title/Abstract] OR “Moldovia”[Title/Abstract] OR “Moldovian”[Title/Abstract] OR “Mongolia”[Title/Abstract] OR “Montenegro”[Title/Abstract] OR “Morocco”[Title/Abstract] OR “Ifni”[Title/Abstract] OR “Mozambique”[Title/Abstract] OR “Myanmar”[Title/Abstract] OR “Myanma”[Title/Abstract] OR “Burma”[Title/Abstract] OR “Namibia”[Title/Abstract] OR “Nepal”[Title/Abstract] OR “Netherlands Antilles”[Title/Abstract] OR “New Caledonia”[Title/Abstract] OR “Nicaragua”[Title/Abstract] OR “Niger”[Title/Abstract] OR “Nigeria”[Title/Abstract] OR “Northern Mariana Islands”[Title/Abstract] OR “Oman”[Title/Abstract] OR “Muscat”[Title/Abstract] OR “Pakistan”[Title/Abstract] OR “Palau”[Title/Abstract] OR “Palestine”[Title/Abstract] OR “Panama”[Title/Abstract] OR “Paraguay”[Title/Abstract] OR “Peru”[Title/Abstract] OR “Philippines”[Title/Abstract] OR “Philipines”[Title/Abstract] OR “Phillipines”[Title/Abstract] OR “Poland”[Title/Abstract] OR “Portugal”[Title/Abstract] OR “Puerto Rico”[Title/Abstract] OR “Romania”[Title/Abstract] OR “Rumania”[Title/Abstract] OR “Roumania”[Title/Abstract] OR “Russia”[Title/Abstract] OR “Russian”[Title/Abstract] OR “Rwanda”[Title/Abstract] OR “Ruanda”[Title/Abstract] OR “Saint Kitts”[Title/Abstract] OR “St Kitts”[Title/Abstract] OR “Nevis”[Title/Abstract] OR “Saint Lucia”[Title/Abstract] OR “St Lucia”[Title/Abstract] OR “Saint Vincent”[Title/Abstract] OR “St Vincent”[Title/Abstract] OR “Grenadines”[Title/Abstract] OR “Samoa”[Title/Abstract] OR “Samoa Islands”[Title/Abstract] OR “Navigator Island”[Title/Abstract] OR “Navigator Islands”[Title/Abstract] OR “Sao Tome”[Title/Abstract] OR “Saudi Arabia”[Title/Abstract] OR “Senegal”[Title/Abstract] OR “Serbia”[Title/Abstract] OR “Montenegro”[Title/Abstract] OR “Seychelles”[Title/Abstract] OR “Sierra Leone”[Title/Abstract] OR “Slovenia”[Title/Abstract] OR “Sri Lanka”[Title/Abstract] OR “Ceylon”[Title/Abstract] OR “Solomon Islands”[Title/Abstract] OR “Somalia”[Title/Abstract] OR “Sudan”[Title/Abstract] OR “Suriname”[Title/Abstract] OR “Surinam”[Title/Abstract] OR “Swaziland”[Title/Abstract] OR “Syria”[Title/Abstract] OR “Syrian”[Title/Abstract] OR “Tajikistan”[Title/Abstract] OR “Tadzhikistan”[Title/Abstract] OR “Tadjikistan”[Title/Abstract] OR “Tadzhik”[Title/Abstract] OR “Tanzania”[Title/Abstract] OR “Thailand”[Title/Abstract] OR “Togo”[Title/Abstract] OR “Togolese Republic”[Title/Abstract] OR “Tonga”[Title/Abstract] OR “Trinidad”[Title/Abstract] OR “Tobago”[Title/Abstract] OR “Tunisia”[Title/Abstract] OR “Turkey”[Title/Abstract] OR “Turkmenistan”[Title/Abstract] OR “Turkmen”[Title/Abstract] OR “Tuvalu”[Title/Abstract] OR “Uganda”[Title/Abstract] OR “Ukraine”[Title/Abstract] OR “Uruguay”[Title/Abstract] OR “USSR”[Title/Abstract] OR “Soviet Union”[Title/Abstract] OR “Union of Soviet Socialist Republics”[Title/Abstract] OR “Uzbekistan”[Title/Abstract] OR “Uzbek”[Title/Abstract] OR “Vanuatu”[Title/Abstract] OR “New Hebrides”[Title/Abstract] OR “Venezuela”[Title/Abstract] OR “Vietnam”[Title/Abstract] OR “Viet Nam”[Title/Abstract] OR “West Bank”[Title/Abstract] OR “Yemen”[Title/Abstract] OR “Yugoslavia”[Title/Abstract] OR “Zambia”[Title/Abstract] OR “Zimbabwe”[Title/Abstract] OR

“Rhodesia”[Title/Abstract]

- **Search concept 5:** “Developing Countries”[Mesh] OR “Africa”[Mesh:NoExp] OR “Africa, Northern”[Mesh:NoExp] OR “Africa South of the Sahara”[Mesh:NoExp] OR “Africa, Central”[Mesh:NoExp] OR “Africa, Eastern”[Mesh:NoExp] OR “Africa, Southern”[Mesh:NoExp] OR “Africa, Western”[Mesh:NoExp] OR “Asia”[Mesh:NoExp] OR “Asia, Central”[Mesh:NoExp] OR “Asia, Southeastern”[Mesh:NoExp] OR “Asia, Western”[Mesh:NoExp] OR “Caribbean Region”[Mesh:NoExp] OR “West Indies”[Mesh:NoExp] OR “South America”[Mesh:NoExp] OR “Latin America”[Mesh:NoExp] OR “Central America”[Mesh:NoExp] OR “Atlantic Islands”[Mesh:NoExp] OR “Commonwealth of Independent States”[Mesh:NoExp] OR “Pacific Islands”[Mesh:NoExp] OR “Indian Ocean Islands”[Mesh:NoExp] OR “Europe, Eastern”[Mesh:NoExp]
- **Search concept 6:** “Afghanistan”[Mesh] OR “Albania”[Mesh] OR “Algeria”[Mesh] OR “American Samoa”[Mesh] OR “Angola”[Mesh] OR “Antigua and Barbuda”[Mesh] OR “Argentina”[Mesh] OR “Armenia”[Mesh] OR “Azerbaijan”[Mesh] OR “Bahrain”[Mesh] OR “Baltic States”[Mesh] OR “Bangladesh”[Mesh] OR “Barbados”[Mesh] OR “Benin”[Mesh] OR “Republic of Belarus”[Mesh] OR “Belize”[Mesh] OR “Bhutan”[Mesh] OR “Bolivia”[Mesh] OR “Bosnia-Herzegovina”[Mesh] OR “Botswana”[Mesh] OR “Brazil”[Mesh] OR “Bulgaria”[Mesh] OR “Burkina Faso”[Mesh] OR “Burundi”[Mesh] OR “Cambodia”[Mesh] OR “Cameroon”[Mesh] OR “Cape Verde”[Mesh] OR “Central African Republic”[Mesh] OR “Chad”[Mesh] OR “Chile”[Mesh] OR “China”[Mesh] OR “Colombia”[Mesh] OR “Comoros”[Mesh] OR “Congo”[Mesh] OR “Costa Rica”[Mesh] OR “Cote d’Ivoire”[Mesh] OR “Croatia”[Mesh] OR “Cuba”[Mesh] OR “Cyprus”[Mesh] OR “Czechoslovakia”[Mesh] OR “Czech Republic”[Mesh] OR “Slovakia”[Mesh] OR “Djibouti”[Mesh] OR “Democratic Republic of the Congo”[Mesh] OR “Democratic People’s Republic of Korea”[Mesh] OR “Dominica”[Mesh] OR “Dominican Republic”[Mesh] OR “East Timor”[Mesh] OR “Ecuador”[Mesh] OR “Egypt”[Mesh] OR “El Salvador”[Mesh] OR “Eritrea”[Mesh] OR “Estonia”[Mesh] OR “Ethiopia”[Mesh] OR “Equatorial Guinea”[Mesh] OR “Fiji”[Mesh] OR “French Guiana”[Mesh] OR “Gabon”[Mesh] OR “Gambia”[Mesh] OR “Georgia (Republic)”[Mesh] OR “Ghana”[Mesh] OR “Greece”[Mesh] OR “Grenada”[Mesh] OR “Guatemala”[Mesh] OR “Guinea”[Mesh] OR “Guinea- Bissau”[Mesh] OR “Guam”[Mesh] OR “Guyana”[Mesh] OR “Haiti”[Mesh] OR “Honduras”[Mesh] OR “Hungary”[Mesh] OR “Independent State of Samoa”[Mesh] OR “India”[Mesh] OR “Indonesia”[Mesh] OR “Iran”[Mesh] OR “Iraq”[Mesh] OR “Jamaica”[Mesh] OR “Jordan”[Mesh] OR “Kazakhstan”[Mesh] OR “Kenya”[Mesh] OR “Korea”[Mesh] OR “Kyrgyzstan”[Mesh] OR “Laos”[Mesh] OR “Latvia”[Mesh] OR “Lebanon”[Mesh] OR “Lesotho”[Mesh] OR “Liberia”[Mesh] OR “Libya”[Mesh] OR “Lithuania”[Mesh] OR “Macedonia (Republic)”[Mesh] OR “Madagascar”[Mesh]
- **Search concept 7:** “Malawi”[Mesh] OR “Malaysia”[Mesh] OR “Mali”[Mesh] OR “Malta”[Mesh] OR “Mauritania”[Mesh] OR “Mauritius”[Mesh] OR “Melanesia”[Mesh] OR “Mexico”[Mesh] OR “Micronesia”[Mesh] OR “Middle East”[Mesh:NoExp] OR “Moldova”[Mesh] OR “Mongolia”[Mesh] OR “Montenegro”[Mesh] OR

“Morocco”[Mesh] OR “Mozambique”[Mesh] OR “Myanmar”[Mesh] OR  
“Namibia”[Mesh] OR “Nepal”[Mesh] OR “Netherlands Antilles”[Mesh] OR “New  
Caledonia”[Mesh] OR “Nicaragua”[Mesh] OR “Niger”[Mesh] OR “Nigeria”[Mesh] OR  
“Oman”[Mesh] OR “Pakistan”[Mesh] OR “Palau”[Mesh] OR “Panama”[Mesh] OR  
“Papua New Guinea”[Mesh] OR “Paraguay”[Mesh] OR “Peru”[Mesh] OR  
“Philippines”[Mesh] OR “Poland”[Mesh] OR “Portugal”[Mesh] OR “Puerto  
Rico”[Mesh] OR “Republic of Korea”[Mesh] OR “Romania”[Mesh] OR “Russia”[Mesh]  
OR “Russia (Pre-1917)”[Mesh] OR “Rwanda”[Mesh] OR “Saint Kitts and Nevis”[Mesh]  
OR “Saint Lucia”[Mesh] OR “Saint Vincent and the Grenadines”[Mesh] OR  
“Samoa”[Mesh] OR “Saudi Arabia”[Mesh] OR “Senegal”[Mesh] OR “Serbia”[Mesh]  
OR “Montenegro”[Mesh] OR “Seychelles”[Mesh] OR “Sierra Leone”[Mesh] OR  
“Slovenia”[Mesh] OR “Sri Lanka”[Mesh] OR “Somalia”[Mesh] OR “South  
Africa”[Mesh] OR “Sudan”[Mesh] OR “Suriname”[Mesh] OR “Swaziland”[Mesh] OR  
“Syria”[Mesh] OR “Tajikistan”[Mesh] OR “Tanzania”[Mesh] OR “Thailand”[Mesh] OR  
“Togo”[Mesh] OR “Tonga”[Mesh] OR “Trinidad and Tobago”[Mesh] OR  
“Tunisia”[Mesh] OR “Turkey”[Mesh] OR “Turkmenistan”[Mesh] OR “Uganda”[Mesh]  
OR “Ukraine”[Mesh] OR “Uruguay”[Mesh] OR “USSR”[Mesh] OR  
“Uzbekistan”[Mesh] OR “Vanuatu”[Mesh] OR “Venezuela”[Mesh] OR  
“Vietnam”[Mesh] OR “Yemen”[Mesh] OR “Yugoslavia”[Mesh] OR “Zambia”[Mesh]  
OR “Zimbabwe”[Mesh]

- **Search concept 8:** “Artificial Intelligence”[Mesh] OR “Augmented intelligence”[Title/Abstract] OR “Computational intelligence”[Title/Abstract] OR “Machine learning”[Title/Abstract]



## Appendix 2: List of AI research articles identified in the review

1. Aguiar, F. S., Torres, R. C., Pinto, J. V., Kritski, A. L., Seixas, J. M., & Mello, F. C. (2016). Development of two artificial neural network models to support the diagnosis of pulmonary tuberculosis in hospitalized patients in Rio de Janeiro, Brazil. *Medical & biological engineering & computing*, 54(11), 1751-1759.
2. Althouse, B. M., Ng, Y. Y., & Cummings, D. A. (2011). Prediction of dengue incidence using search query surveillance. *PLoS neglected tropical diseases*, 5(8), e1258.
3. Andrade, B. B., Reis-Filho, A., Barros, A. M., Souza-Neto, S. M., Nogueira, L. L., Fukutani, K. F., ... & Barral-Netto, M. (2010). Towards a precise test for malaria diagnosis in the Brazilian Amazon: comparison among field microscopy, a rapid diagnostic test, nested PCR, and a computational expert system based on artificial neural networks. *Malaria journal*, 9(1), 117.
4. Azman, A. S., Lessler, J., Luquero, F. J., Bhuiyan, T. R., Khan, A. I., Chowdhury, F., ... Calderwood, S. B. (2019). Estimating cholera incidence with cross-sectional serology. *Science Translational Medicine*, 11(480), eaau6242
5. Beshah, T., & Hill, S. (2010, March). Mining road traffic accident data to improve safety: role of road-related factors on accident severity in Ethiopia. *In 2010 AAAI Spring Symposium Series*
6. Brunskill, E., & Lesh, N. (2010, March). Routing for rural health: optimizing community health worker visit schedules. *In 2010 AAAI Spring Symposium Series*.
7. Buczak, A. L., Baugher, B., Guven, E., Ramac-Thomas, L. C., Elbert, Y., Babin, S. M., & Lewis, S. H. (2015). Fuzzy association rule mining and classification for the prediction of malaria in South Korea. *BMC medical informatics and decision making*, 15(1), 47.
8. Buczak, A. L., Koshute, P. T., Babin, S. M., Feighner, B. H., & Lewis, S. H. (2012). A data-driven epidemiological prediction method for dengue outbreaks using local and remote sensing data. *BMC medical informatics and decision making*, 12(1), 124.
9. Chai, J., Wang, D., Zhou, M., Xu, W., Liang, G., & Shen, Y. F. (2012). Developing and piloting an expert system for better routine voluntary HIV counseling and testing in China: preliminary results and lessons. *AIDS care*, 24(4), 424-433.
10. Chandir, S., et al. "Using Predictive Analytics to Identify Children at High Risk of Defaulting From a Routine Immunization Program: Feasibility Study." *JMIR Public Health and Surveillance*, 4(3) (2018), e63.
11. Chankong, T., Theera-Umpon, N., & Auephanwiriyakul, S. (2014). Automatic cervical cell segmentation and classification in Pap smears. *Computer methods and programs in biomedicine*, 113(2), 539-556.
12. Christie, S. Ariane, et al. "Machine Learning Without Borders? An Adaptable Tool to Optimize Mortality Prediction in Diverse Clinical Settings." *Journal of Trauma and Acute Care Surgery* (2018).
13. Correa, M., Zimic, M., Barrientos, F., Barrientos, R., Román-Gonzalez, A., Pajuelo, M. J., ... & Figueroa, D. A. (2018). Automatic classification of pediatric pneumonia based on lung ultrasound pattern recognition. *PloS One*, 13(12), e0206410.
14. Elveren, E., & Yumuşak, N. (2011). Tuberculosis disease diagnosis using artificial neural network trained with genetic algorithm. *Journal of medical systems*, 35(3), 329-332.

15. Go, T., Kim, J. H., Byeon, H., & Lee, S. J. (2018). Machine learning-based in-line holographic sensing of unstained malaria-infected red blood cells. *Journal of Biophotonics*, e201800101.
16. Haddawy, Peter, et al. "Spatiotemporal Bayesian networks for malaria prediction." *Artificial Intelligence in Medicine* (2017).
17. Hu, L., Bell, D., Antani, S., Xue, Z., Yu, K., Horning, M. P., ... Long, L. R. (2019). An Observational Study of Deep Learning and Automated Evaluation of Cervical Images for Cancer Screening. *JNCI: Journal of the National Cancer Institute*.
18. Huang, D., & Wu, Z. (2017). Forecasting outpatient visits using empirical mode decomposition coupled with back-propagation artificial neural networks optimized by particle swarm optimization. *PloS one*, 12(2), e0172539.
19. Hussain, Owais A., and Khurum N. Junejo. "Predicting treatment outcome of drug-susceptible tuberculosis patients using machine-learning models." *Informatics for Health and Social Care* (2018): 1-17.
20. Jaeger, S., Juarez-Espinosa, O. H., Candemir, S., Poostchi, M., Yang, F., Kim, L., ... & Hurt, D. (2018). Detecting drug-resistant tuberculosis in chest radiographs. *International journal of computer assisted radiology and surgery*, 1-11.
21. Jiang, D., Hao, M., Ding, F., Fu, J., & Li, M. (2018). Mapping the Transmission Risk of Zika Virus using Machine Learning Models. *Acta Tropica*.
22. Kabaria, C. W., Molteni, F., Mandike, R., Chacky, F., Noor, A. M., Snow, R. W., & Linard, C. (2016). Mapping intra-urban malaria risk using high resolution satellite imagery: a case study of Dar es Salaam. *International journal of health geographics*, 15(1), 26.
23. Kesorn, K., Ongruk, P., Chompoonsri, J., Phumee, A., Thavara, U., Tawatsin, A., & Siriyasatien, P. (2015). Morbidity rate prediction of dengue hemorrhagic fever (DHF) using the support vector machine and the Aedes aegypti infection rate in similar climates and geographical areas. *PloS one*, 10(5), e0125049.
24. Khan, S., Ullah, R., Shahzad, S., Anbreen, N., Bilal, M., & Khan, A. (2018). Analysis of Tuberculosis Disease through Raman Spectroscopy and Machine Learning. *Photodiagnosis and Photodynamic Therapy*.
25. Kumar, R., Srivastava, R., & Srivastava, S. (2015). Detection and classification of cancer from microscopic biopsy images using clinically significant and biologically interpretable features. *Journal of medical engineering*, 2015.
26. Liang, H., Tsui, B. Y., Ni, H., Valentim, C. C., Baxter, S. L., Liu, G., ... He, L. (2019). Evaluation and accurate diagnoses of pediatric diseases using artificial intelligence. *Nature Medicine*, 1.
27. Lopes, U. K., & Valiati, J. F. (2017). Pre-trained convolutional neural networks as feature extractors for tuberculosis detection. *Computers in biology and medicine*, 89, 135-143.
28. Meena, K., Tayal, D. K., Gupta, V., & Fatima, A. (2019). Using classification techniques for statistical analysis of Anemia. *Artificial Intelligence in Medicine*, 94, 138-152.
29. Merali, H. S., Lin, L. Y., Li, Q., & Bhalla, K. (2019). Using street imagery and crowdsourcing internet marketplaces to measure motorcycle helmet use in Bangkok, Thailand. *Injury Prevention*.
30. Mohamed, E. I., Mohamed, M. A., Moustafa, M. H., Abdel-Mageed, S. M., Moro, A. M., Baess, A. I., & El-Kholy, S. M. (2017). Qualitative analysis of biological tuberculosis

- samples by an electronic nose-based artificial neural network. *The International Journal of Tuberculosis and Lung Disease*, 21(7), 810-817.
31. Moyo, S., Doan, T. N., Yun, J. A., & Tshuma, N. (2018). Application of machine learning models in predicting length of stay among healthcare workers in underserved communities in South Africa. *Human Resources for Health*, 16(1), 68.
  32. Nan, Yongqing, and Yanyan Gao. "A machine learning method to monitor China's AIDS epidemics with data from Baidu trends." *PloS One* 13.7 (2018): e0199697.
  33. Osamor, V. C., Azeta, A. A., & Ajulo, O. O. (2014). Tuberculosis–Diagnostic Expert System: An architecture for translating patients information from the web for use in tuberculosis diagnosis. *Health informatics journal*, 20(4), 275-287.
  34. Papageorghiou, A. T., Kemp, B., Stones, W., Ohuma, E. O., Kennedy, S. H., Purwar, M., ... & Gravett, M. G. (2016). Ultrasound-based gestational-age estimation in late pregnancy. *Ultrasound in Obstetrics & Gynecology*, 48(6), 719-726.
  35. Pathinarupothi, R. K., Durga, P., & Rangan, E. S. (2018). Data to diagnosis in global health: a 3P approach. *BMC Medical Informatics and Decision Making*, 18(1), 78.
  36. Phakhounthong, Khansoudaphone, et al. "Predicting the severity of dengue fever in children on admission based on clinical features and laboratory indicators: application of classification tree analysis." *BMC Pediatrics* 18.1 (2018): 109.
  37. Rittenhouse, K. J., Vwalika, B., Keil, A., Winston, J., Stoner, M., Kapasa, M., ... Stringer, J. (2019). Improving preterm newborn identification in low-resource settings with machine learning. *BioRxiv*, 334904.
  38. Robertson, J., & DeHart, D. J. (2010, March). An agile and accessible adaptation of Bayesian inference to medical diagnostics for rural health extension workers. In 2010 *AAAI Spring Symposium Series*.
  39. Rosas, M. A., Bezerra, A. F. B., & Duarte-Neto, P. J. (2013). Use of artificial neural networks in applying methodology for allocating health resources. *Revista de saude publica*, 47(1), 128-136.
  40. Scavuzzo, Juan M., et al. "Modeling Dengue Vector Population Using Remotely Sensed Data and Machine Learning." *Acta Tropica* (2018).
  41. Shafii, M., Hosseini, S. M., Arab, M., Asgharizadeh, E., & Farzianpour, F. (2016). Performance analysis of hospital managers using fuzzy AHP and fuzzy TOPSIS: Iranian experience. *Global journal of health science*, 8(2), 137.
  42. Simões, P. W., Cesconetto, S., de Abreu, L. L. T., Côrtes, M., & Manenti, S. A. (2015). A data mining approach to identify sexuality patterns in a Brazilian university population. *Studies in health technology and informatics*, 216, 1074.
  43. Su, J., Xu, X., He, Y., & Song, J. (2016). Automatic detection of cervical cancer cells by a two-level cascade classification system. *Analytical Cellular Pathology*, 2016.
  44. Torres, K., et al. Automated microscopy for routine malaria diagnosis: a field comparison on Giemsa-stained blood films in Peru. *Malaria journal*, (2018) 17(1), 339.
  45. Uthoff, R. D., Song, B., Sunny, S., Patrick, S., Suresh, A., Kolar, T., ... & Kuriakose, M. A. (2018). Point-of-care, smartphone-based, dual-modality, dual-view, oral cancer screening device with neural network classification for low-resource communities. *PloS one*, 13(12), e0207493.
  46. van den Heuvel, T. L., Petros, H., Santini, S., de Korte, C. L., & van Ginneken, B. (2018). Automated Fetal Head Detection and Circumference Estimation from Free-Hand

- Ultrasound Sweeps Using Deep Learning in Resource-Limited Countries. *Ultrasound in Medicine & Biology*.
47. Veretennikova, M. A., Sikorskii, A., & Boivin, M. J. (2018). Parameters of stochastic models for electroencephalogram data as biomarkers for child's neurodevelopment after cerebral malaria. *Journal of Statistical Distributions and Applications*, 5(1), 8.
  48. Xia, T., Song, X., Zhang, H., Song, X., Kanasugi, H., & Shibasaki, R. (2019). Measuring spatiotemporal accessibility to emergency medical services through big GPS data. *Health & Place*, 56, 53-62.
  49. Xu, Q., Gel, Y. R., Ramirez, L. L. R., Nezafati, K., Zhang, Q., & Tsui, K. L. (2017). Forecasting influenza in Hong Kong with Google search queries and statistical model fusion. *PloS one*, 12(5), e0176690.
  50. Yousefi, Milad, et al. "Chaotic genetic algorithm and Adaboost ensemble metamodeling approach for optimum resource planning in emergency departments." *Artificial intelligence in medicine* (2017)
  51. Zhang, P., Chen, B., Ma, L., Li, Z., Song, Z., Duan, W., & Qiu, X. (2015). The large scale machine learning in an artificial society: prediction of the Ebola outbreak in Beijing. *Computational intelligence and neuroscience*, 2015, 6.
  52. Zhao, Chao, Jingchi Jiang, and Yi Guan. "EMR-based medical knowledge representation and inference via Markov random fields and distributed representation learning." *Artificial Intelligence in Medicine* (2018).
  53. Zhao, M., Wu, A., Song, J., Sun, X., & Dong, N. (2016). Automatic screening of cervical cells using block image processing. *Biomedical engineering online*, 15(1), 14.
  54. Zhou, N., et al. "Concordance Study Between IBM Watson for Oncology and Clinical Practice for Patients with Cancer in China." *The Oncologist*. (2018).
